# Supplementary material
Source: PubMed Central journal article supplement (PMC4406266)
Supplement: supp_dxu147_Figure_S1.pdf [file supp_dxu147_Figure_S1.pdf]

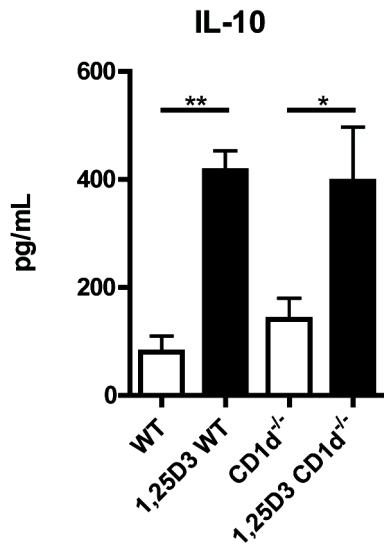

*Figure S1. MOG-specific cytokine response on day 14 EAE.* Draining LN from WT and CD1d<sup>-/-</sup> mice given control or 1,25D3 diet were isolated on day 14 of EAE and cultured *in vitro* with 20µg/mL MOG peptide. IL-10 levels were determined by ELISA. \* p < 0.05, \*\* p < 0.01 by ANOVA-based Tukey test, 1 representative of 2 experiments, n = 4-5.
