# Supplementary material
Source: PubMed Central journal article supplement (PMC4406266)
Supplement: supp_dxu147_Figure_S2.pdf [file supp_dxu147_Figure_S2.pdf]

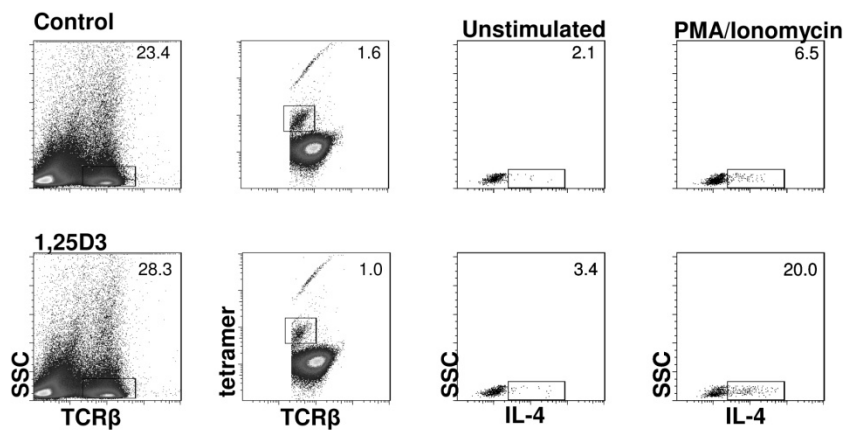

**Figure S2. iNKT cell production of IL-4 during EAE.** Representative flow gating of TCR $\beta^+$  CD1d- $\alpha$ -GalCer tetramer $^+$  cells from the spleens of Ctrl-treated or 1,25D3-treated mice on day 8 of EAE. Cells were stimulated *ex vivo* with PMA and ionomycin for 4 hours with monensin for the final 3 hours and cells were stained intracellularly for IL-4.
