# Supplementary material
Source: PubMed Central journal article supplement (PMC4406266)
Supplement: supp_dxu147_Figure_S3.pdf [file supp_dxu147_Figure_S3.pdf]

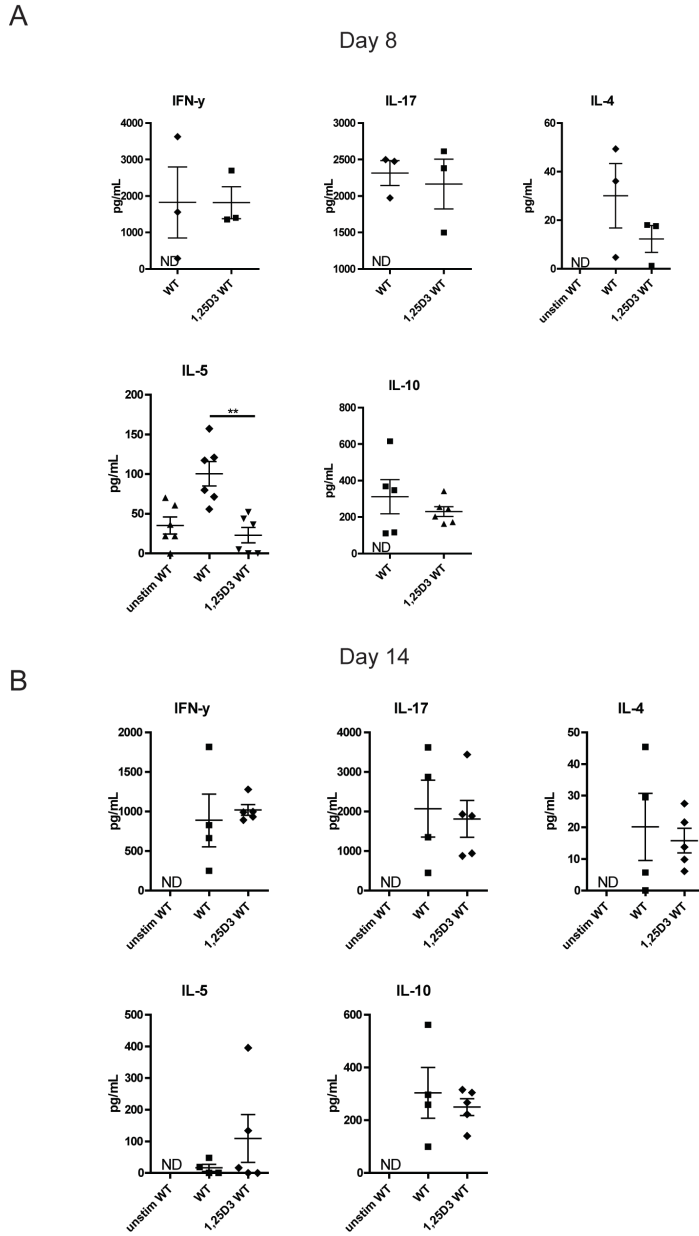

*Figure S3. 1,25D3 diet and iNKT cell function during EAE.* Draining LNs were isolated from mice given 1,25D3 diet or control diet on A) day 8 or B) day 14 of EAE. LN cells were stimulated *in vitro* for 72 hours with 200ng/mL  $\alpha$ -GalCer and cytokine levels in the supernatants were determined by ELISA. The data show the mean  $\pm$  SEM of 1 representative of 2 experiments, n = 3-4.
